# Supplementary material for: Insertion Sequence (IS) Element-Mediated Activating Mutations of the Cryptic Aromatic β-Glucoside Utilization (BglGFB) Operon Are Promoted by the Anti-Terminator Protein (BglG) in Escherichia coli
Source: MDPI journal article supplement (doi:10.3390/ijms23031505), 2022-01-28
Supplement: s1 [file s1]

## Supplementary Materials

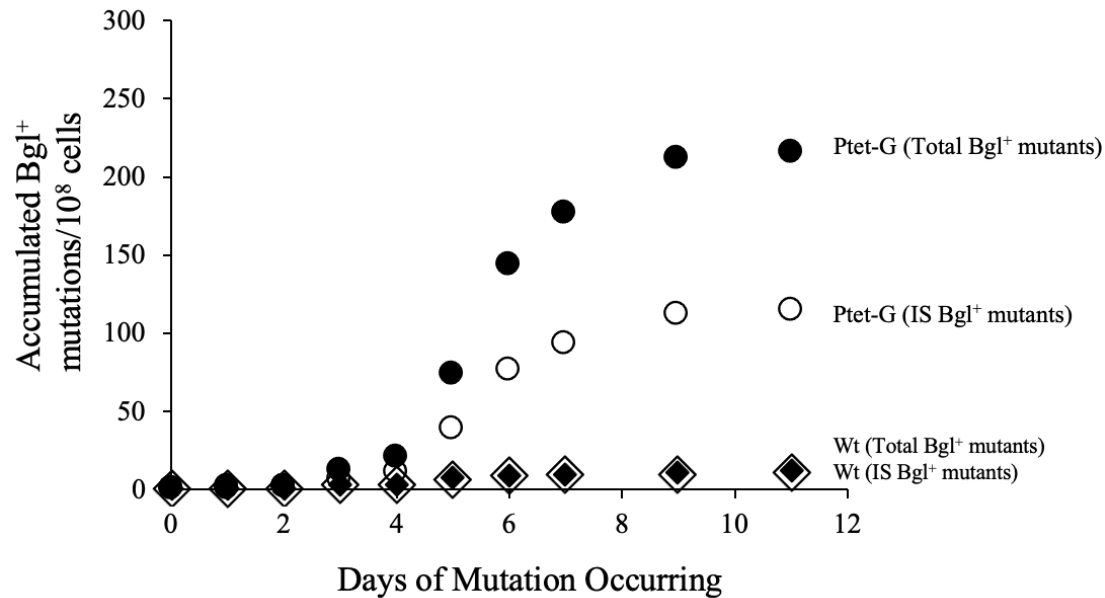

**Figure S1. Bgl<sup>+</sup> mutations on minimal M9 + arbutin agar plates comparing wild type and Ptet-G.**  $2 \times 10^7$  cells were applied onto each minimal M9 agar plate containing 0.5% arbutin as the sole carbon source. The frequencies of total Bgl<sup>+</sup> mutations and IS insertional Bgl<sup>+</sup> mutations were determined as described in Figure 1 and the Methods section. Solid diamonds: total mutations of wild type; open diamonds: IS insertional mutations of wild type; solid circles: total mutations of Ptet-G; open circles: IS insertional mutations of Ptet-G.

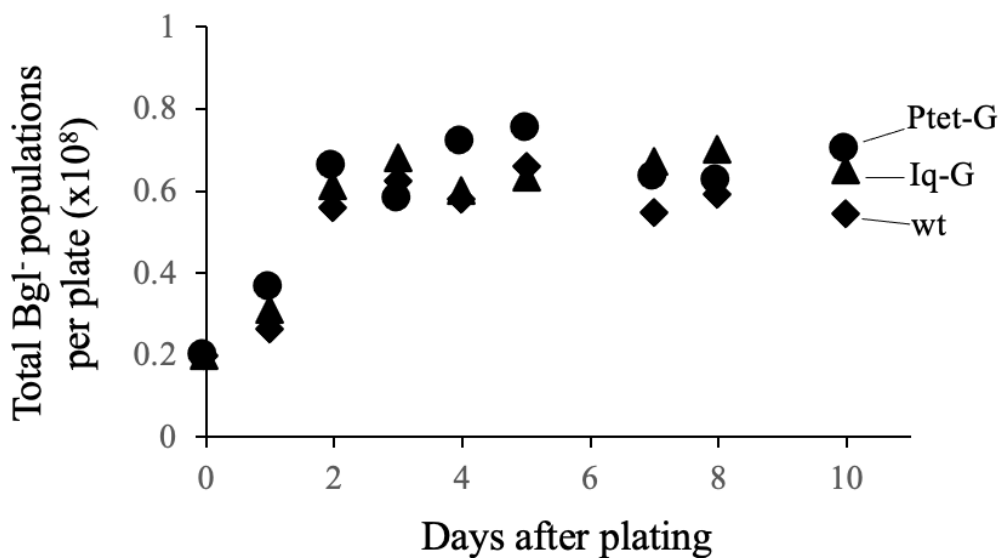

**Figure S2. Determination of total Bgl<sup>-</sup> cell populations on M9 + salicin agar plates.** The total Bgl<sup>-</sup> cell populations of strains wild type, Iq-G and Ptet-G used for Bgl<sup>+</sup> mutation assays on M9 + salicin agar plates (see Figure 1) were determined as reported previously (1916241 and 19682247). See the Methods. Some growth (about 1.5 generations) was observed for the Bgl<sup>-</sup> populations (background populations) in the first two days, and afterwards the populations were relatively constant.

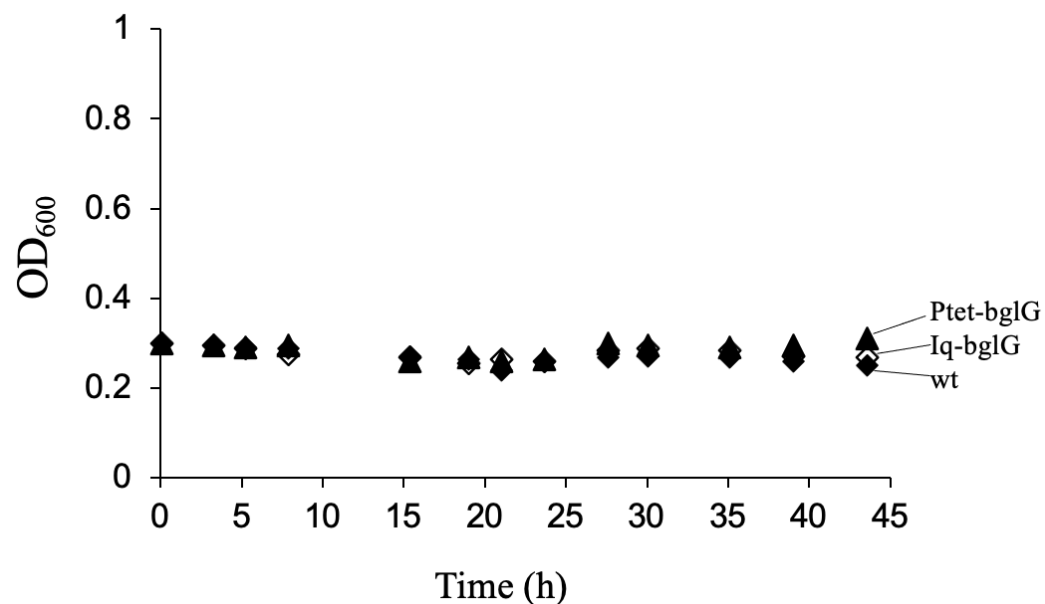

**Figure S3. Determination of total populations of strains wild type, Iq-G and Ptet-G in liquid M9 + salicin medium.** Test strains (from single fresh colonies) were cultured in LB liquid medium for about 8 h at 30°C, washed twice using M9 salts and diluted into 5ml of liquid M9 + salicin medium (initial OD<sub>600</sub>=0.3) in glass tubes (18 cm x 1.5 cm). The tubes were rotated (250 rpm) at 30°C, and the optical densities (OD<sub>600</sub>) were measured over time.

A (Duplication of 12 nucleotides in *hns* of an IS-independent Bgl<sup>+</sup> mutant)

```

ATG AGC GAA GCA CTT AAA ATT CTG AAC AAC ATC CGT ACT CTT CGT GCG
CAG GCA AGA GAA TGT ACA CTT GAA ACG CTG GAA GAA ATG CTG GAA GAA
ATG CTG GAA AAA TTA GAA GTT GTT GTT AAC GAA CGT CGC GAA GAA GAA
AGC GCG GCT GCT GCT GAA GTT GAA GAG CGC ACT CGT AAA CTG CAG CAA
TAT CGC GAA ATG CTG ATC GCT GAC GGT ATT GAC CCG AAC GAA CTG CTG
AAT AGC CTT GCT GCC GTT AAA TCT GGC ACC AAA GCT AAA CGT GCT CAG
CGT CCG GCA AAA TAT AGC TAC GTT GAC GAA AAC GGC GAA ACT AAA ACC
TGG ACT GGC CAA GGC CGT ACT CCA GCT GTA ATC AAA AAA GCA ATG GAT
GAG CAA GGT AAA TCC CTC GAC GAT TTC CTG ATC AAG CAA TAA

```

B (Duplication of four residues “EMLE” of in HNS)

```

MSEALKILNNIRTTLRAQARECTLETLEEMLEEMLEKLEVVVNERREEESAAAAEVEERTRKLQQ
YREMLIADGIDPNELLNSLA AVKSGTKAKRAQRPAKYSYVDENGETKTWTGQGRTPAVIKKAMD
EQGKSLDDFLIKQ

```

**Figure S4. Identification of a non-IS insertional Bgl<sup>+</sup> mutation.** **A.** A duplication of 12 nucleotides in the *hns* gene of an IS-independent Bgl<sup>+</sup> mutant. The 12 bolded nucleotides in red are the direct repeat of the 12 bolded nucleotides in black. **B.** The 12 nucleotide duplication leads to a duplication of four residues, EMLE, in H-NS. The bolded “EMLE” residues in red are the direct repeat of the bolded residues in black.

A

ATG AAC ATG CAA ATC ACC AAA ATT CTC AAT GTG **TAG** GCT GGA  
 GCT GCT TCG AAG TTC CTA TAC TTT CTA GAG AAT AGG AAC TTC  
 GGA ATA GGA ACT AAG GAG GAT ATT CAT ATG GAA AGA ATT

B

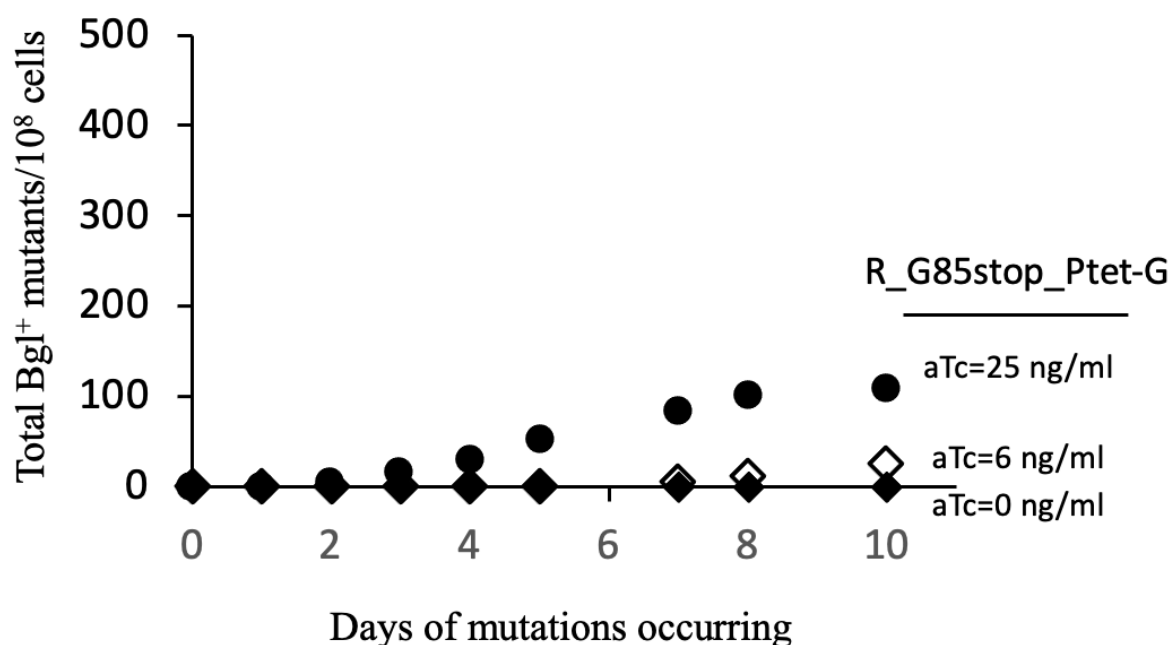

**Figure S5. Construction of strain R\_G85stop\_Ptet-G and Bgl<sup>+</sup> mutation assay using this strain. A.** Construction of a *bglG* knockout mutant G85stop. The DNA sequence of the portion of *bglG* corresponding to the altered N-terminal domain of BglG in strain G85 is shown. The 85-bp DNA region in grey (Figure 5A) was replaced by an 85-bp DNA scar (red-faced nucleotides in Figure 5S). This 85-bp scar carries a stop codon, TAG (yellow highlight), so that no intact BglG protein is produced in this strain. This strain was named G85stop. The constitutively expressed *tetR* and the *Ptet-bglG* cassette were transferred to G85stop, yielding strain R\_G85stop\_Ptet-G. **B.** Bgl<sup>+</sup> mutation assay using strain R\_G85stop\_Ptet-G. Mutation assays were conducted on the agar plates of M9 + salicin + aTc (0 to 25 ng/ml aTc) as described in Figure 1 and the Methods section.

**Table S1. Strains and plasmids used in this study**

| Strains or plasmids    | Genotype or description                                                                                                         | Reference or source |
|------------------------|---------------------------------------------------------------------------------------------------------------------------------|---------------------|
| <b>Strains</b>         |                                                                                                                                 |                     |
| BW25113                | Wild type, <i>lacI<sup>q</sup> rrnB<sub>T14</sub> ΔlacZ<sub>WJ</sub> ΔhsdR514 ΔaraBAD<sub>AH33</sub> ΔrhaBAD<sub>LD78</sub></i> | PMID 10829079       |
| Ptet-G                 | <i>Ptet</i> driving <i>bglG</i> at the <i>intS</i> locus in BW25113                                                             | This study          |
| Iq-G                   | <i>lacIq</i> driving <i>bglG</i> at the <i>intS</i> locus in BW25113                                                            | This study          |
| BW-RI                  | BW25113 constitutively expressing TetR                                                                                          | PMID 17713988       |
| R_Ptet-G               | <i>Ptet</i> -G constitutively expressing TetR                                                                                   | This study          |
| Δ <i>crp</i>           | Deletion of <i>crp</i> in BW25113                                                                                               | PMID 19682247       |
| Δ <i>crp</i> _Ptet-G   | <i>Ptet</i> driving <i>bglG</i> at the <i>intS</i> locus in Δ <i>crp</i>                                                        | This study          |
| Δ <i>bglB</i>          | Deletion of <i>bglB</i> in BW25113                                                                                              | This study          |
| Δ <i>bglB</i> _Ptet-G  | <i>Ptet</i> driving <i>bglG</i> at the <i>intS</i> locus in Δ <i>bglB</i>                                                       | This study          |
| G85                    | Altered 28 residues at the N-terminus of BglG in BW25113                                                                        | This study          |
| G85stop                | One stop codon introduced at the N-terminus of BglG in G85                                                                      | This study          |
| G85stop_Ptet-G         | <i>Ptet</i> driving <i>bglG</i> at the <i>intS</i> locus in G85stop                                                             | This study          |
| R_G85stop_Ptet-G       | G85stop_Ptet-G constitutively expressing TetR                                                                                   | This study          |
| Ptet-G85               | <i>Ptet</i> driving <i>bglG85</i> at the <i>intS</i> locus in BW25113                                                           | This study          |
| T-SACK                 | Template for the <i>tetA-sacB</i> cassette                                                                                      | PMID 24203710       |
| OBglGMut               | BglG binding site mutation in terminator T1 of the <i>bgl</i> operon                                                            | This study          |
| OBglGMut_Ptet-G        | <i>Ptet</i> driving <i>bglG</i> at the <i>intS</i> locus in OBglGMut                                                            | This study          |
| R_OBglGMut_Ptet-G      | OBglGMut_Ptet-G constitutively expressing TetR                                                                                  | This study          |
| EQ42                   | Seamless deletion of <i>lacY</i>                                                                                                | PMID 20064380       |
| BW25113_Z              | BW25113 carrying the <i>bgl</i> operon reporter <i>Pbgl-bglG-lacZ</i> at the <i>lac</i> locus                                   | This study          |
| Ptet-G_Z               | <i>Ptet</i> -G carrying the <i>bgl</i> operon reporter <i>Pbgl-bglG-lacZ</i> at the <i>lac</i> locus                            | This study          |
| Iq-G_Z                 | <i>Iq</i> -G carrying the <i>bgl</i> operon reporter <i>Pbgl-bglG-lacZ</i> at the <i>lac</i> locus                              | This study          |
| <b>Plasmids</b>        |                                                                                                                                 |                     |
| pKDT                   | A <i>rrnB</i> terminator ( <i>rrnBT</i> ) in pKD13                                                                              | PMID 20064380       |
| pKDT_Ptet              | <i>Ptet</i> cloned downstream of the <i>rrnB</i> terminator in pKDT                                                             | PMID 20064380       |
| pZSint4                | A constitutive promoter driving <i>tetR</i>                                                                                     | PMID 9092630        |
| pKDT_Iq                | <i>lacIq</i> cloned downstream of the <i>rrnB</i> terminator in pKDT                                                            | This study          |
| pKD4                   | Km resistance and use for chromosomal integration                                                                               | PMID 10829079       |
| pKDT_ <i>Pbgl-bglG</i> | The <i>bgl</i> promoter driving <i>bglG</i> in pKDT                                                                             | This study          |

**Table S2. Oligonucleotides used in this study**

| Name          | Sequence                                                                                                | Use                                                                                                                                            |
|---------------|---------------------------------------------------------------------------------------------------------|------------------------------------------------------------------------------------------------------------------------------------------------|
| intS-P1       | agatttacagttcgtcatggttcgcttcagatcggtgacagccgactccatgtgtaggc<br>tggagctgcttc                             | Amplification of <i>km<sup>r</sup>:rrnBT:Ptet</i> from plasmid pKDT- <i>Ptet</i> and fusion of <i>km<sup>r</sup>:rrnBT:Ptet</i> to <i>bglG</i> |
| Ptet-R        | gaattttggtgatttgcatgttcattggtacctttctcctttaaataaattc                                                    | Amplification of <i>km<sup>r</sup>:rrnBT:Ptet</i> from plasmid pKDT- <i>Ptet</i>                                                               |
| bglG-F        | gaaaggtaccatgaacatgcaaatcaccaaaattctc                                                                   | Amplification of <i>bglG</i> from BW25113 chromosome                                                                                           |
| intS-bglG-P2  | gatagttgtaaggctcgtcactccaccttctcatcaagccagtcgccccttcagtgttct<br>ttgcgcacgcgctc                          | Amplification of <i>bglG</i> from BW25113 chromosome and fusion of <i>km<sup>r</sup>:rrnBT:Ptet</i> to <i>bglG</i>                             |
| intS-ver-R2   | aaagggaatgaagtctatcatccaagtc                                                                            | Verification of integration of <i>km<sup>r</sup>:rrnBT:Ptet-bglG</i> into the <i>intS</i> site                                                 |
| Pbgl-Xho-F    | atactcgagtgccgatgagctggataaactgctg                                                                      | Amplification of <i>bgl</i> operon fragment for <i>lacZ</i> fusions                                                                            |
| bglG-BamH-R   | ttaggaccttagactattttctggctaactccgctc                                                                    | Amplification of <i>bgl</i> operon fragment for <i>lacZ</i> fusions                                                                            |
| Pbgl-Z1       | gcatttacgttgacaccatcgaaatggcgcaaaacctttcgcggtatgtgtaggctggag<br>ctgcttc                                 | Amplification of <i>km:rrnBT:Pbgl-bglG</i> from plasmid pKDT- <i>Pbgl-bglG</i>                                                                 |
| bglG-Z2       | cgacggccagtgaaatccgtaatcatggtcatagctgtttctgtgtgaaattagactattt<br>ttctggctaactcc                         | Amplification of <i>km:rrnBT:Pbgl-bglG</i> from plasmid pKDT- <i>Pbgl-bglG</i>                                                                 |
| Iq-Xho-F      | atactcgagtgatgctattctgggaagaag                                                                          | Cloning <i>lacIq</i> into pKDT                                                                                                                 |
| Iq-Kpn-R      | catggtaccaccctgaattgactctc                                                                              | Cloning <i>lacIq</i> into pKDT                                                                                                                 |
| lacIq-R       | gagaattttggtgatttgcatgttcattaccaccctgaattgactctcttcggggc                                                | Amplification of <i>km<sup>r</sup>:rrnBT:Iq</i> from plasmid pKDT-Iq                                                                           |
| Iq.bglG-F     | gagtcaattcagggtggtgaatatgaacatgcaaatcaccaaaattctcaac                                                    | Amplification of <i>bglG</i> from BW25113 chromosome                                                                                           |
| bglG.NT-P1    | gtttataaaaaaggtccttgctatgaacatgcaaatcaccaaaattctcaatgtgaaggc<br>tggagctgcttcg                           | Replacing BglG N-terminus with a <i>km<sup>r</sup></i> gene plus no stop codon                                                                 |
| bglG85-P2     | catgactgctcaaggcactactcttttctattccacttgagtaattctttccatgaatatc<br>ctccttag                               | Replacing BglG N-terminus with a <i>km<sup>r</sup></i> gene                                                                                    |
| bglG.NTstp-P1 | gtttataaaaaaggtccttgctatgaacatgcaaatcaccaaaattctcaatgtgtaggct<br>ggagctgcttcg                           | Replacing BglG N-terminus with a <i>km<sup>r</sup></i> gene plus a stop codon                                                                  |
| bglG85-Rn     | cacattgagaattttggtgatttgcatgttcattggtacctttctc                                                          | <i>Ptet</i> driving <i>bglG85</i> at the <i>intS</i> locus                                                                                     |
| bglG85-Fn     | gaaaggtaccatgaacatgcaaatcaccaaaattctcaatgtg                                                             | <i>Ptet</i> driving <i>bglG85</i> at the <i>intS</i> locus                                                                                     |
| ObglG-tet-F   | ccgaacctggatgttcgttataaaaaccattaataaatgactggattgttactcctaatttt<br>gttgacactctatc                        | Amplification of the <i>tetA-sacB</i> cassette from strain T-SACK                                                                              |
| ObglG-sac-R   | aacctgacttcaccagtattctctggttatgtcaggttttgcctgcgaatg<br>atcaaagggaaaactgtccatatgc                        | Amplification of the <i>tetA-sacB</i> cassette from strain T-SACK                                                                              |
| ObglG-100     | gaacctggatgttcgttataaaaaccattaataaatgactggattgttaccattcgcagg<br>caaacctgacataaccagagaatactggtgaagtcgggt | 100 bp oligo carrying the TG deletion used for replacing the <i>tetA-sacB</i> cassette                                                         |
